# Supplementary material for: Effects of eggshell and seashell powder as natural dietary calcium supplements on growth, molting frequency, and carapace calcium composition of juvenile red claw crayfish, Cherax quadricarinatus
Source: PeerJ. 2023 Jul 12;11:e15449. doi: 10.7717/peerj.15449 (PMC10349561; doi:10.7717/peerj.15449)
Supplement: Supplemental Information 1 [file peerj-11-15449-s001.xlsx]

## Sheet: WATER QUALITY REPLICATE 1
			DAY	WATER QUALITY PARAMETER REPLICATE 1
				TEMPERATURE, °C	pH	Total Ammonia, mg/L	Nitrite, mg/L	Hardness, mg/L
			1	25.52	7.63	0.17	0.31	218.48
			2	26.4	7.57	0.16	0.32	215.97
			3	26.11	7.64	0.15	0.31	215.53
			4	26.02	7.64	0.15	0.32	217.07
			5	26.05	7.73	0.16	0.31	215.82
			6	25.51	7.59	0.16	0.32	219.33
			7	25.53	7.74	0.15	0.32	218.02
			8	26.04	7.62	0.15	0.32	216.38
			9	25.64	7.69	0.17	0.31	219.26
			10	26.44	7.59	0.16	0.32	219.52
			11	26.3	7.58	0.15	0.32	218.02
			12	26.36	7.62	0.17	0.31	216.03
			13	25.74	7.58	0.17	0.31	217.5
			14	25.77	7.59	0.15	0.32	217.08
			15	25.66	7.72	0.15	0.32	219.02
			16	26.09	7.62	0.16	0.31	217.3
			17	25.62	7.7	0.17	0.32	218.24
			18	25.52	7.58	0.17	0.32	219.56
			19	25.99	7.55	0.16	0.31	217.02
			20	26.23	7.61	0.17	0.31	217.88
			21	25.51	7.57	0.17	0.31	217.91
			22	26.35	7.69	0.16	0.32	217.37
			23	26.32	7.6	0.15	0.31	215.99
			24	26.34	7.67	0.17	0.32	219.12
			25	25.79	7.59	0.17	0.32	215.83
			26	25.78	7.67	0.16	0.31	217.88
			27	25.9	7.59	0.16	0.32	215.7
			28	25.52	7.68	0.17	0.32	215.77
			29	25.77	7.74	0.15	0.31	215.13
			30	26.2	7.7	0.15	0.32	217.58
			31	26.9	7.56	0.15	0.31	216.03
			32	25.89	7.72	0.16	0.31	216.25
			33	25.59	7.64	0.16	0.31	216.61
			34	26.34	7.65	0.16	0.31	218.42
			35	26.21	7.65	0.15	0.31	217.46
			36	26.38	7.72	0.17	0.31	235.1
			37	26.11	7.55	0.17	0.31	218.97
			38	26.15	7.72	0.15	0.32	225.2
			39	26.02	7.65	0.17	0.31	216.61
			40	26.08	7.72	0.16	0.32	216.56
			41	25.67	7.59	0.15	0.32	218
			42	26.38	7.56	0.17	0.31	217.4
			43	26.08	7.67	0.16	0.31	219.52
			44	26.4	7.9	0.16	0.32	217.12
			45	25.66	7.65	0.16	0.31	227.2
			46	26.34	7.72	0.16	0.31	229.12
			47	26.11	7.73	0.2	0.32	219.38
			48	28.2	8.2	0.17	0.31	225.12
			49	28.8	7.69	0.17	0.31	218.47
			50	25.53	7.9	0.17	0.31	223.1
			51	26.26	8.3	0.16	0.31	218.52
			52	25.61	7.64	0.15	0.32	217.22
			53	28.2	8.4	0.2	0.32	217.47
			54	25.86	7.73	0.16	0.32	220.12
			55	25.95	7.68	0.16	0.32	219.65
			56	27.9	7.63	0.16	0.31	217.15
			57	26.44	7.69	0.2	0.32	219.04
			58	26.8	7.68	0.2	0.31	217.67
			59	26.2	7.9	0.2	0.32	216.37
			60	27.9	7.8	0.2	0.31	216.53
			AVERAGE	26.1997	7.6955	0.1645	0.314667	218.545
			SD	0.69833	0.16191	0.0140731	0.00503098	3.4686
			AVERAGE ± SD	26.2 ± 0.70	7.70 ± 0.16	0.16 ± 0.01	0.31 ± 0.01	218.54 ± 3.47

## Sheet: WATER QUALITY REPLICATE 2
							DAY	WATER QUALITY PARAMETER REPLICATE 2
								TEMPERATURE, °C	pH	Total Ammonia, mg/L	Nitrite, mg/L	Hardness, mg/L
							1	26.46	7.83	0.23	0.33	227.09
							2	26.44	7.75	0.22	0.34	228.27
							3	26.77	7.82	0.17	0.34	221.42
							4	26.23	7.84	0.16	0.33	228.13
							5	26.91	7.76	0.22	0.35	224.15
							6	26.41	7.75	0.17	0.36	221.98
							7	26.96	7.8	0.22	0.33	223.58
							8	26.11	7.8	0.2	0.33	229.53
							9	26.1	7.81	0.17	0.36	220.3
							10	26.45	7.79	0.2	0.35	222.09
							11	26.13	7.76	0.21	0.36	225.06
							12	26.08	7.84	0.22	0.33	220.94
							13	26.63	7.75	0.23	0.34	227.01
							14	26.09	7.84	0.21	0.33	225.62
							15	26.7	7.82	0.24	0.34	228.24
							16	26.98	7.79	0.19	0.36	220.12
							17	26.96	7.75	0.15	0.34	226.14
							18	26.01	7.75	0.21	0.34	229.15
							19	26.83	7.83	0.23	0.35	222.1
							20	26.44	7.79	0.19	0.33	225.16
							21	26.02	7.81	0.22	0.33	224.94
							22	26.12	7.82	0.15	0.35	228.19
							23	26.5	7.75	0.22	0.36	228.03
							24	26.94	7.84	0.17	0.34	222.09
							25	26.54	7.78	0.18	0.34	225.83
							26	26.21	7.82	0.24	0.35	228.22
							27	26.82	7.79	0.18	0.34	220.2
							28	26.23	7.78	0.17	0.33	222.69
							29	26.25	7.76	0.19	0.36	225.07
							30	26.12	7.82	0.19	0.33	222.26
							31	26.71	7.77	0.23	0.35	226.87
							32	26.98	7.82	0.24	0.33	229.1
							33	26.4	7.76	0.15	0.33	224.98
							34	26.81	7.82	0.21	0.33	226.76
							35	26.73	7.75	0.21	0.36	224.46
							36	26.73	7.76	0.21	0.35	226.35
							37	26.82	7.76	0.15	0.35	224.23
							38	26.56	7.77	0.21	0.34	222.31
							39	26.16	7.77	0.22	0.34	228.11
							40	26.04	7.77	0.15	0.36	228.44
							41	26.52	7.81	0.15	0.36	222.35
							42	26.37	7.75	0.23	0.35	226.81
							43	26.49	7.79	0.22	0.36	224.08
							44	26.89	7.76	0.21	0.36	225.42
							45	26.27	7.75	0.16	0.35	222.4
							46	26.66	7.82	0.15	0.35	225.94
							47	26.9	7.82	0.15	0.34	226.63
							48	26.55	7.79	0.22	0.34	229.05
							49	26.14	7.84	0.17	0.35	226.63
							50	26.38	7.84	0.19	0.35	224.24
							51	26.78	7.75	0.24	0.33	229.35
							52	26.69	7.83	0.2	0.36	222.56
							53	26.32	8.2	0.15	0.33	228.54
							54	26.25	7.79	0.19	0.33	224.22
							55	26.59	7.84	0.15	0.35	226.87
							56	26.82	7.83	0.19	0.36	227.81
							57	26.46	7.79	0.24	0.35	224.84
							58	26.83	7.84	0.18	0.36	224.41
							59	26.52	7.83	0.18	0.33	221.77
							60	26	8.1	0.21	0.33	225.12
							AVERAGE	26.4968	7.806	0.195167	0.344167	225.237
							SD	0.301884	0.0725375	0.0295441	0.0115409	2.63782
							AVERAGE ± SD	26.5 ± 0.30	7.81 ± 0.07	0.20 ± 0.03	0.34 ± 0.01	225.24 ± 2.64

## Sheet: WATER QUALITY REPLICATE 3
						DAY	WATER QUALITY PARAMETER REPLICATE 3
							TEMPERATURE, °C	pH	Total Ammonia, mg/L	Nitrite, mg/L	Hardness, mg/L
						1	26.82	7.8	0.14	0.28	213.22
						2	26.09	7.8	0.15	0.29	212.9
						3	26.27	7.83	0.14	0.32	211.22
						4	26.38	7.85	0.16	0.28	213.92
						5	26.83	7.87	0.14	0.31	212.02
						6	26.76	7.87	0.15	0.32	213.04
						7	26.64	7.84	0.15	0.29	210.06
						8	26.1	7.87	0.17	0.28	212.1
						9	26.85	7.81	0.14	0.31	211.9
						10	26.37	7.84	0.15	0.32	211.34
						11	26.81	7.84	0.15	0.29	214.85
						12	26.03	7.81	0.17	0.29	212.97
						13	26.25	7.85	0.16	0.28	211.89
						14	26.26	7.8	0.14	0.28	212.37
						15	26.75	7.8	0.14	0.3	210.8
						16	26.41	7.87	0.16	0.31	212.33
						17	26.74	7.81	0.14	0.31	212.75
						18	26.39	7.81	0.14	0.32	214.9
						19	26.19	7.8	0.15	0.3	213.12
						20	26.27	7.83	0.15	0.29	213.29
						21	26.35	7.86	0.15	0.31	211.17
						22	26.12	7.89	0.15	0.32	210.99
						23	26.29	7.8	0.14	0.28	214.26
						24	26.55	7.8	0.17	0.32	214.16
						25	26.9	7.8	0.15	0.28	212.61
						26	26.93	7.8	0.17	0.31	211.75
						27	26.08	7.81	0.16	0.28	212.3
						28	26.89	7.88	0.17	0.29	212.65
						29	26.56	7.82	0.15	0.29	211.87
						30	26.52	7.85	0.16	0.29	213.83
						31	26.89	7.84	0.16	0.31	212.32
						32	26.72	7.81	0.16	0.3	211.38
						33	26.87	7.83	0.17	0.3	211.9
						34	22.21	7.83	0.16	0.29	214.87
						35	26.74	7.8	0.15	0.31	212.18
						36	26.27	7.85	0.16	0.32	214.71
						37	26.59	7.81	0.17	0.31	213.63
						38	26.85	7.83	0.15	0.29	211.94
						39	26.01	7.82	0.17	0.29	211.31
						40	26.89	7.83	0.14	0.3	211.97
						41	26.05	7.88	0.14	0.28	214.87
						42	26	7.85	0.16	0.32	212.18
						43	25	7.87	0.16	0.28	212.49
						44	26.85	7.85	0.17	0.31	213.19
						45	26.93	7.8	0.16	0.28	210.09
						46	26.86	7.82	0.16	0.32	211.49
						47	26.01	7.81	0.15	0.3	210.52
						48	26.66	7.82	0.14	0.32	210.85
						49	26.95	7.87	0.15	0.32	213.56
						50	26.52	7.88	0.16	0.3	213.97
						51	26.2	7.86	0.17	0.31	213.42
						52	26.76	7.82	0.16	0.31	213.4
						53	26.15	7.82	0.15	0.29	210.99
						54	26.81	7.86	0.16	0.32	210.7
						55	25.1	7.81	0.16	0.31	211.43
						56	26.32	7.82	0.16	0.29	213.73
						57	26.36	7.82	0.16	0.28	210.02
						58	26.26	7.83	0.14	0.3	212.64
						59	25.5	7.82	0.16	0.3	211.98
						60	26.89	7.8	0.15	0.28	213.41
						AVERAGE	26.377	7.83117	0.1545	0.299667	212.462
						SD	0.690415	0.0264954	0.0101556	0.0146098	1.28067
						AVERAGE ± SD	26.38 ± 0.69	7.83 ± 0.03	0.15 ± 0.01	0.30 ± 0.01	212.46 ± 1.28
