# Supplementary material for: Effects of eggshell and seashell powder as natural dietary calcium supplements on growth, molting frequency, and carapace calcium composition of juvenile red claw crayfish, Cherax quadricarinatus
Source: PeerJ. 2023 Jul 12;11:e15449. doi: 10.7717/peerj.15449 (PMC10349561; doi:10.7717/peerj.15449)
Supplement: Supplemental Information 2 [file peerj-11-15449-s002.xlsx]

## Sheet: RAW DATA CA-P RATIO ES AND SS
					EGGSHELL						SEASHELL
					Sample						Sample
						Replicate 1	Replicate 2	Replicate 3	AVERAGE			Replicate 1	Replicate 2	Replicate 3	AVERAGE
					Calcium Content, %	32.15	34.19	36.87	34.4033		Calcium Content, %	39.41	36.91	37.8	38.04
					Phosphorous Content, %	0.24	0.26	0.31	0.27		Phosphorous Content, %	0.05	0.01	0.03	0.03
