# Supplementary material for: Effects of eggshell and seashell powder as natural dietary calcium supplements on growth, molting frequency, and carapace calcium composition of juvenile red claw crayfish, Cherax quadricarinatus
Source: PeerJ. 2023 Jul 12;11:e15449. doi: 10.7717/peerj.15449 (PMC10349561; doi:10.7717/peerj.15449)
Supplement: Supplemental Information 3 [file peerj-11-15449-s003.xlsx]

## Sheet: RAW DATA CA-P RATIO FEED
						Diet 1 (0% Egg Shell)						Diet 2 (3% Egg Shell)						Diet 3 (6% Egg Shell)
						Sample						Sample						Sample
							Replicate 1	Replicate 2	Replicate 3	AVERAGE			Replicate 1	Replicate 2	Replicate 3	AVERAGE			Replicate 1	Replicate 2	Replicate 3	AVERAGE
						Calcium In Diet, %	0.33	0.34	0.32	0.33		Calcium In Diet, %	0.88	0.9	0.85	0.876667		Calcium In Diet, %	2.43	2.44	2.42	2.43
						Phosphorous In Diet, %	1.27	1.28	1.26	1.27		Phosphorous In Diet, %	1.3	1.31	1.29	1.3		Phosphorous In Diet, %	1.36	1.39	1.35	1.36
						Calcium-Phosphorous Ratio	0.259843	0.265625	0.253968	0.259812		Calcium-Phosphorous Ratio	0.676923	0.687023	0.658915	0.68		Calcium-Phosphorous Ratio	1.78676	1.7554	1.79259	1.77825
						Diet 4 (6% Sea Shell)						Diet 5 (9% Egg Shell)
						Sample						Sample
							Replicate 1	Replicate 2	Replicate 3	AVERAGE			Replicate 1	Replicate 2	Replicate 3	AVERAGE
						Calcium In Diet, %	2.83	2.87	2.85	2.85		Calcium In Diet, %	4.34	4.38	4.36	4.36
						Phosphorous In Diet, %	0.91	0.95	0.93	0.93		Phosphorous In Diet, %	1.41	1.43	1.45	1.43
						Calcium-Phosphorous Ratio	3.10989	3.02105	3.06452	3.06		Calcium-Phosphorous Ratio	3.07801	3.06294	3.0069	3.04
