# Supplementary material for: Effects of eggshell and seashell powder as natural dietary calcium supplements on growth, molting frequency, and carapace calcium composition of juvenile red claw crayfish, Cherax quadricarinatus
Source: PeerJ. 2023 Jul 12;11:e15449. doi: 10.7717/peerj.15449 (PMC10349561; doi:10.7717/peerj.15449)
Supplement: Supplemental Information 4 [file peerj-11-15449-s004.xlsx]

## Sheet: OVERALL GROWTH RATE RAW DATA
		RAW DATA GROWTH PERFORMANCE
		Diet 1 (0% Egg Shell)					Diet 2 (3% Egg Shell)					Diet 3 (6% Egg Shell)
		Sample	INDIVIDUAL				Sample	INDIVIDUAL				Sample	INDIVIDUAL
			Replicate 1	Replicate 2	Replicate 3			Replicate 1	Replicate 2	Replicate 3			Replicate 1	Replicate 2	Replicate 3
		Initial Weight Average, g	0.2	0.21	0.2		Initial Weight Average, g	0.23	0.21	0.2		Initial Weight Average, g	0.21	0.2	0.2
		Final Weight Average, g	0.75	0.77	0.78		Final Weight Average, g	0.83	0.8	0.81		Final Weight Average, g	0.88	0.85	0.86
		Wet Weight Gain Average, g	0.55	0.56	0.58		Wet Weight Gain Average, g	0.6	0.59	0.61		Wet Weight Gain Average, g	0.67	0.65	0.66
		Feed Intake Average Wet, g	1.27	1.32	1.31		Feed Intake Average Wet, g	1.29	1.28	1.3		Feed Intake Average Wet, g	1.3	1.29	1.32
		Feed Intake Average Dry, g	1.0795	1.122	1.1135		Feed Intake Average Dry, g	1.0965	1.088	1.105		Feed Intake Average Dry, g	1.105	1.0965	1.122
		Body weight Gain (BWG) %	275	266.667	290		Body weight Gain (BWG) %	260.87	280.952	305		Body weight Gain (BWG) %	319.048	325	330
		Specific Growth Rate (SGR) (%/day)	2.20293	2.16547	2.26829		Specific Growth Rate (SGR) (%/day)	2.13891	2.22917	2.33119		Specific Growth Rate (SGR) (%/day)	2.38802	2.41153	2.43103
		Feed Conversion Ratio (FCR)	1.96273	2.00357	1.91983		Feed Conversion Ratio (FCR)	1.8275	1.84407	1.81148		Feed Conversion Ratio (FCR)	1.64925	1.68692	1.7
		Survivability, %	37.5	50	50		Survivability, %	62.5	62.5	50		Survivability, %	75	75	75
			3 out of 8	4 out of 8	4 out of 8			5 out of 8	5 out of 8	4 out of 8			6 out of 8	6 out of 8	6 out of 8
		Arcsine SR	37.7612	45	45		Arcsine SR	52.2388	52.2388	45		Arcsine SR	60	60	60
		Molting Frequency	2.25	2	2.375		Molting Frequency	2.875	3	2.75		Molting Frequency	3.25	3.375	3.125
		Calcium Percentage in Exoskeleton, %	17.75	17.81	17.83		Calcium Percentage in Exoskeleton, %	20.12	19.85	20.19		Calcium Percentage in Exoskeleton, %	22.13	21.98	22.08
		Diet 4 (6% Sea Shell)					Diet 5 (9% Egg Shell)
		Sample	INDIVIDUAL				Sample	INDIVIDUAL
			Replicate 1	Replicate 2	Replicate 3			Replicate 1	Replicate 2	Replicate 3
		Initial Weight Average, g	0.21	0.22	0.2		Initial Weight Average, g	0.22	0.2	0.21
		Final Weight Average, g	0.85	0.9	0.83		Final Weight Average, g	0.85	0.8	0.83
		Wet Weight Gain Average, g	0.64	0.68	0.63		Wet Weight Gain Average, g	0.63	0.6	0.62
		Feed Intake Average Wet, g	1.32	1.27	1.35		Feed Intake Average Wet, g	1.32	1.3	1.32
		Feed Intake Average Dry, g	1.122	1.0795	1.1475		Feed Intake Average Dry, g	1.122	1.105	1.122
		Body weight Gain (BWG) %	304.762	309.091	315		Body weight Gain (BWG) %	286.364	300	295.238
		Specific Growth Rate (SGR) (%/day)	2.33021	2.34795	2.37185		Specific Growth Rate (SGR) (%/day)	2.25268	2.31049	2.29053
		Feed Conversion Ratio (FCR)	1.75313	1.5875	1.82143		Feed Conversion Ratio (FCR)	1.78095	1.84167	1.80968
		Survivability, %	75	75	75		Survivability, %	75	62.5	75
			6 out of 8	6 out of 8	6 out of 8			6 out of 8	5 out of 8	6 out of 8
		Arcsine SR	60	60	60		Arcsine SR	60	52.2388	60
		Molting Frequency	3.125	3.125	3.5		Molting Frequency	3.125	3.25	3.375
		Calcium Percentage in Exoskeleton, %	22.04	22.1	21.86		Calcium Percentage in Exoskeleton, %	23.25	23.01	23.12
