# Supplementary material for: Effects of eggshell and seashell powder as natural dietary calcium supplements on growth, molting frequency, and carapace calcium composition of juvenile red claw crayfish, Cherax quadricarinatus
Source: PeerJ. 2023 Jul 12;11:e15449. doi: 10.7717/peerj.15449 (PMC10349561; doi:10.7717/peerj.15449)
Supplement: Supplemental Information 5 [file peerj-11-15449-s005.xlsx]

## Sheet: Sheet1
					BODY WEIGHT GAIN AND MOLTING FREQUENCY
					CORRELATION TEST
						MEAN	N	PEARSON CORRELATION, R	SIG (2-TAILED), P	DETAIL
					BWG	297.52 ± 20.86	15	0.654	0.008	At 95% Confidence Interval, Molting frequency and body weight gain strongly correlate with each other
					MF	2.97 ± 0.44	15
					CALCIUM % IN EXOSKELETON AND SURVIVAL RATE
					CORRELATION TEST
						MEAN	N	PEARSON CORRELATION, R	SIG (2-TAILED), P	DETAIL
					Ca % in Exoskeleton	21.01 ± 1.96	15	0.872	0	At 95% Confidence Interval, Calicium Percentage in Exoskeleton and Survival Rate are strongly correlate with each other
					SR	65.00 ± 12.67	15
